# Supplementary material for: Potential user interest in new long-acting contraceptives: Results from a mixed methods study in Burkina Faso and Uganda
Source: PLOS journal article supplement (doi:10.1371/journal.pone.0217333), 2019-05-28
Supplement: S1 (10.1371/journal.pone.0217333.s001) [file journal.pone.0217333.s001]

Supporting Information Appendix 1. Method descriptions and images used in the PMA2020 Round 4 surveys in Burkina Faso and Uganda

|                                                                                                                                                                                                                                                                                                                                                                                                                                                                                                                                                                                                                                                                                                       |                                                                                       |
|-------------------------------------------------------------------------------------------------------------------------------------------------------------------------------------------------------------------------------------------------------------------------------------------------------------------------------------------------------------------------------------------------------------------------------------------------------------------------------------------------------------------------------------------------------------------------------------------------------------------------------------------------------------------------------------------------------|---------------------------------------------------------------------------------------|
| <p>Now I would like to talk with you about methods that are not yet widely available in (Uganda or Burkina Faso) or that are currently being developed. For each method, I will first describe it and then ask if you would be interested in using it at some point in the future. All these methods are highly effective at preventing pregnancy.</p>                                                                                                                                                                                                                                                                                                                                                |                                                                                       |
| <p><b>Longer-lasting injectable:</b></p> <p>This method is an injection that a woman would get from a health provider. It would prevent pregnancy for six months.</p> <p>While using this method, a woman may have irregular periods or her period may stop. If a woman has these side-effects, they cannot be stopped until the end of the six months.</p> <p>This method would contain hormones, substances that change how the body functions, like in existing contraceptive methods such as the pill, the injectable, or the implant.</p>                                                                                                                                                        |    |
| <p><b>Longer-lasting single rod implant:</b></p> <p>This method is a single rod that would be placed in a woman's arm by a health provider. It would prevent pregnancy for 5 years but could be removed by a health provider at any time.</p> <p>While using this method, a woman may have irregular periods.</p> <p>This method would contain hormones, substances that change how the body functions, like in existing contraceptive methods such as the pill, the injectable, or the implant.</p>                                                                                                                                                                                                  |   |
| <p><b>Dissolving implant:</b></p> <p>This method is a single rod that would be placed in a woman's arm by a health provider. It would prevent pregnancy for one and a half years.</p> <p>This method would dissolve over time so it would not need to be removed, however, it could be removed by a health provider during the first year.</p> <p>While using this method, a woman may have irregular periods.</p> <p>This method would contain hormones, substances that change how the body functions, like in existing contraceptive methods such as the pill, the injectable, or the implant.</p>                                                                                                 |  |
| <p><b>IUD with hormones:</b></p> <p>This is a method where a loop or coil is placed inside a woman's womb by a health provider. It would prevent pregnancy for 5 years but could be removed by a health provider at any time.</p> <p>While using this method, a woman may have a lighter period or her period may stop. This method can also be used as a treatment for heavy and painful menstruation. A woman using this method may experience some pain and discomfort for a short time after it is placed.</p> <p>This method would contain hormones, substances that change how the body functions, like in existing contraceptive methods such as the pill, the injectable, or the implant.</p> |  |

|                                                                                                                                                                                                                                                                                                                                                                                                                                                                                                                                                     |                                                                                     |
|-----------------------------------------------------------------------------------------------------------------------------------------------------------------------------------------------------------------------------------------------------------------------------------------------------------------------------------------------------------------------------------------------------------------------------------------------------------------------------------------------------------------------------------------------------|-------------------------------------------------------------------------------------|
| <p><b>New IUD without hormones:</b></p> <p>This is a method where a loop or coil is placed inside a woman's womb by a health provider. It would prevent pregnancy for 10 or more years but could be removed by a health provider at any time.</p> <p>This method would be different from the current IUD in its shape or size. While using this method, a woman may have heavier periods. A woman using this method may experience some pain and discomfort for a short time after it is placed.</p> <p>This method would not contain hormones.</p> |  |
| <p><b>Permanent method:</b></p> <p>A health provider would perform a procedure on the womb that would permanently prevent pregnancy. It would not be an operation.</p> <p>Afterward, the woman may need to return to the health provider for an exam to confirm the method is working completely.</p> <p>This method would not affect a woman's period.</p> <p>This method would not contain hormones.</p>                                                                                                                                          | <p><i>No image</i></p>                                                              |

After each method description women were asked, "If this method were available, would you be interested in using it?", to which the answer options were:

- Definitely would use it,
- Probably would use it,
- Probably would not use it,
- Definitely would not use it, and
- No response.
